# Supplementary material for: Trace doping of cobalt oxide using lanthanum for effective catalytic oxidation of carbon monoxide
Source: Royal Society of Chemistry journal article supplement (doi:10.1039/d3nj01005h), 2023-01-01
Supplement: d3nj01005h1.pdf [file d3nj01005h1.pdf]

## Supplementary Information

### Trace doping of cobalt oxide using lanthanum for effective catalytic oxidation of carbon monoxide

Zhou Zhicheng<sup>a</sup>, Jiang Tingting<sup>a</sup>, Liu Tao<sup>b,c\*</sup>, Zheng Shourong<sup>a</sup>

<sup>a</sup> State Key Laboratory of Pollution Control and Resource Reuse, School of the Environment, Nanjing University, Nanjing 210046, P.R. China

<sup>b</sup> School of Environmental Engineering, Nanjing Institute of Technology, Nanjing 211167, P.R. China

<sup>c</sup> School of Chemistry and Chemical Engineering, Nanjing University, Nanjing 210046, P.R. China

## Material characterization

The morphology of materials was determined using a Quanta 250 FEG field-emission scanning electron microscope (FEI Co., USA). The XRD patterns of the samples were obtained on an D/max-RA powder diffraction meter (Rigaku Co., Japan), operating with Cu K $\alpha$  radiation (40 kV, 40 mA). Surface areas of the catalysts were obtained using N<sub>2</sub> adsorption–desorption isotherms at –196 °C on a Micromeritics ASAP 2020 instrument (Micromeritics Instrument Corp., Norcross, USA). The contents of La in catalysts were determined by were measured by inductively coupled plasma atomic emission spectrometry (ICP-AES, J-A1100, Jarrell-Ash, Franklin, MA). The XPS of the catalysts was conducted on a ESCALAB 250 X-ray Photoelectron Spectroscopy (Thermo, Co., USA) equipped with a monochromatized Al K $\alpha$  excitation source ( $h\nu = 1486.6$  eV). H<sub>2</sub> temperature-programmed reduction (H<sub>2</sub>-TPR) were performed with an AutochemII 2920 Chemisorption Apparatus (Micrometric Co., USA). The samples were pretreated under N<sub>2</sub> flow at 110 °C for 1h and cooled down to room temperature. The temperature was elevated to 700 °C from room temperature at a heating rate of 10 °C/min under 10 vol.% H<sub>2</sub>/Ar flow.

### CO oxidation activity experiment

Prior to the oxidation experiment, 20 mg catalyst was tableted and screened by a 40-mesh sieve. Then, the catalyst was immobilized in a quartz tube with quartz wool. The reaction temperature was measured by a thermocouple. The catalyst was pretreated under N<sub>2</sub> flow (20 mL/min) at 100°C for 1 h with a heating rate of 5°C/min. After cooling down to room temperature, the background value was collected. The CO oxidation experiment under dry conditions was conducted at a flow rate of 100 mL/min, with a feed gas consisting of 1 vol.% CO, 10 vol.% O<sub>2</sub>, and N<sub>2</sub> balance. For the CO oxidation experiment under wet conditions, the feed gas was changed by the addition of 3 vol.% water vapor. The quartz tube was maintained at each preset temperature to obtain a steady state, and the CO concentration was determined by an IR spectrometer (Thermo Scientific Nicolet iS10, USA).

### In situ CO catalytic oxidation experiment

To further clarify the catalytic performance of the catalysts, we conducted in situ CO catalytic oxidation experiments using DRIFT. The catalyst was pretreated under N<sub>2</sub> flow at 100°C with a heating rate of 5°C/min for 1 h. Under dry conditions, the catalyst was exposed to a feed gas consisting of 1 vol.% CO and 10 vol.% O<sub>2</sub> balanced with N<sub>2</sub> at different temperatures for 10 min, and the IR spectrum was obtained. Under wet condition, the feed gas composition was varied by the addition of 3 vol.% water vapor.

### Catalyst stability experiment

The stability and activity of different catalysts under dry and wet conditions were investigated at 150°C for 15 h.

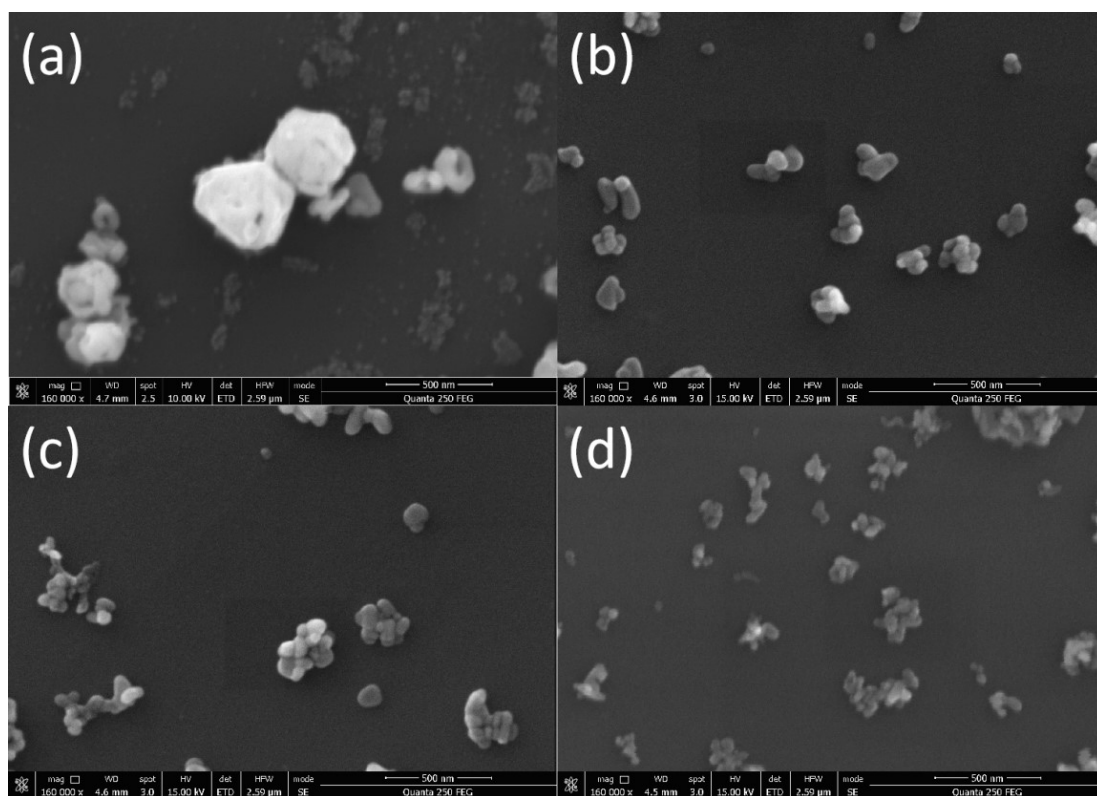

**Fig. S1** SEM images of  $\text{Co}_3\text{O}_4$  (a),  $\text{La-Co}_3\text{O}_4(\text{IM})$  (b),  $\text{La-Co}_3\text{O}_4(\text{CP})$  (c) and 2% $\text{La-Co}_3\text{O}_4$  (d) catalysts

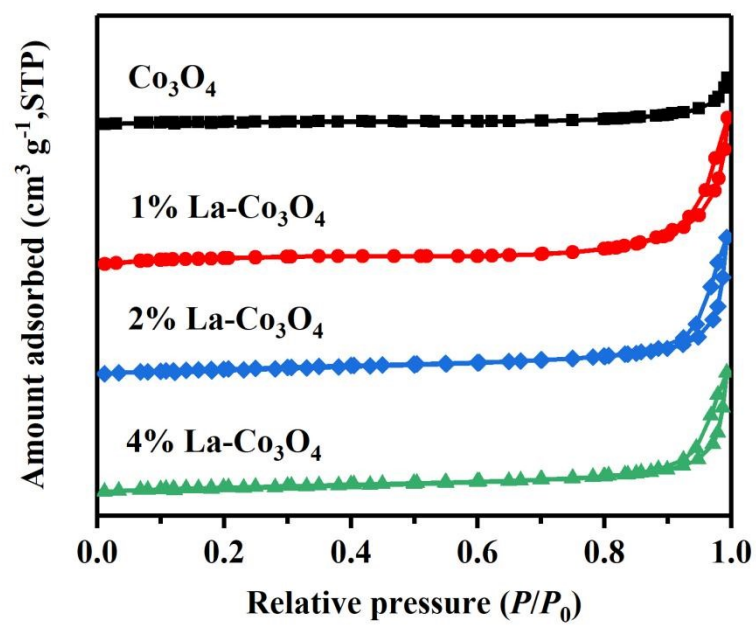

**Fig. S2** N<sub>2</sub> adsorption-desorption curve of Co<sub>3</sub>O<sub>4</sub> and  $x\%$ La-Co<sub>3</sub>O<sub>4</sub> catalysts

**Table S1** The amounts of H<sub>2</sub> consumption of samples from H<sub>2</sub>-TPR experiments

| Samples                             | Total H <sub>2</sub> consumption (mmol/g) |
|-------------------------------------|-------------------------------------------|
| Co <sub>3</sub> O <sub>4</sub>      | 1.59                                      |
| 1%La-Co <sub>3</sub> O <sub>4</sub> | 2.90                                      |
| 2%La-Co <sub>3</sub> O <sub>4</sub> | 3.03                                      |
| 4%La-Co <sub>3</sub> O <sub>4</sub> | 2.89                                      |

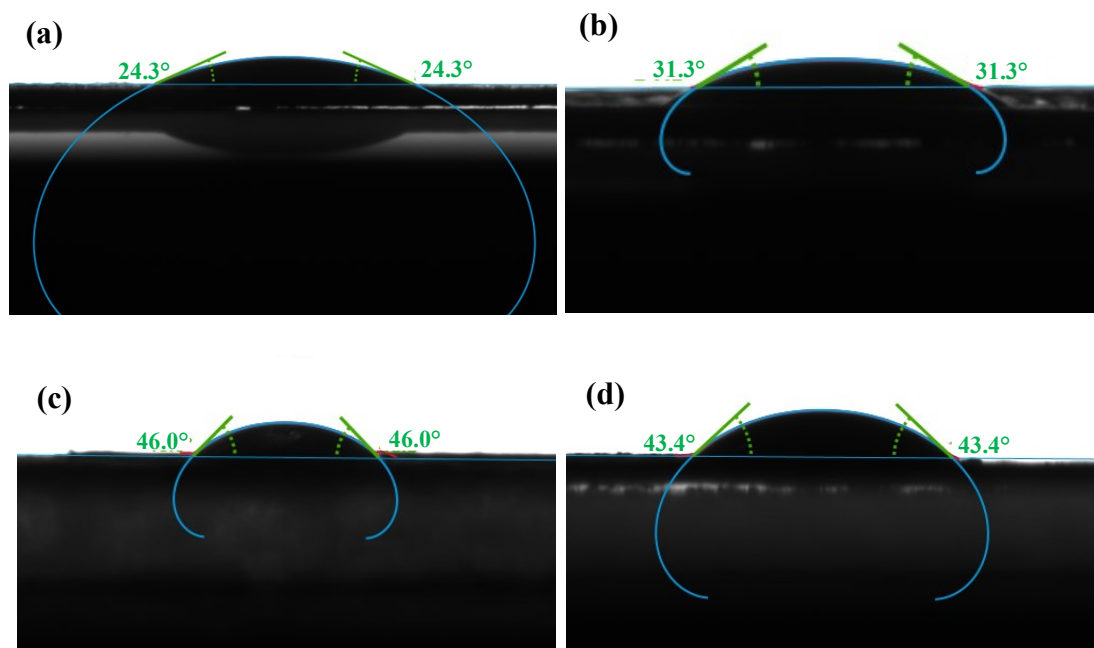

**Fig. S3** Water contact angle of  $\text{Co}_3\text{O}_4$  (a), 1%La- $\text{Co}_3\text{O}_4$  (b), 2%La- $\text{Co}_3\text{O}_4$  (c) and 4%La- $\text{Co}_3\text{O}_4$  (d)

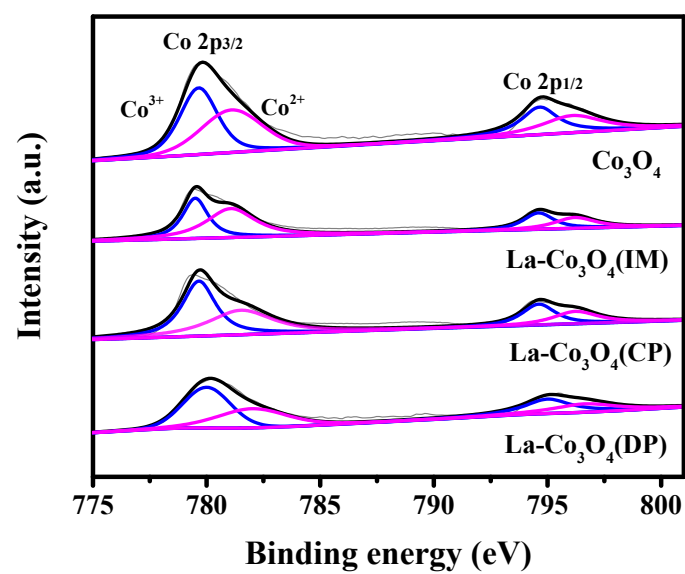

**Fig. S4** Co 2p XPS spectra of  $\text{Co}_3\text{O}_4$   $\text{Co}_3\text{O}_4$  and La-doped  $\text{Co}_3\text{O}_4$  prepared by different synthesis methods

**Table S2**  $\text{Co}^{3+}/\text{Co}^{2+}$  ratios in  $\text{Co}_3\text{O}_4$  and La-doped  $\text{Co}_3\text{O}_4$  prepared by different synthesis methods

| Samples                          | $\text{Co}^{3+}/\text{Co}^{2+}$ |
|----------------------------------|---------------------------------|
| $\text{Co}_3\text{O}_4$          | 1.06                            |
| La- $\text{Co}_3\text{O}_4$ (IM) | 0.82                            |
| La- $\text{Co}_3\text{O}_4$ (CP) | 1.19                            |
| La- $\text{Co}_3\text{O}_4$ (DP) | 1.33                            |

**Table S3** Comparison of catalytic performance of various catalysts

| Catalysts                                        | GHSV<br>(mL g <sup>-1</sup> h <sup>-1</sup> ) | Dry condition |           | Wet<br>condition |           | Ref.      |
|--------------------------------------------------|-----------------------------------------------|---------------|-----------|------------------|-----------|-----------|
|                                                  |                                               | $T_{50}$      | $T_{100}$ | $T_{50}$         | $T_{100}$ |           |
| 2%La-Co <sub>3</sub> O <sub>4</sub>              | 120 000                                       | 105           | 130       | 145              | 165       | This work |
| Mn-doped Co <sub>3</sub> O <sub>4</sub> spheres  | 150 000                                       | 143           | 182       |                  |           | 1         |
| Co <sub>0.50</sub> Sn <sub>0.50</sub>            | 18 000                                        | 125           | 150       |                  |           | 2         |
| N-Co <sub>3</sub> O <sub>4</sub>                 | 30 000                                        | 83            | 125       |                  | 130       | 3         |
| A-N-Co <sub>3</sub> O <sub>4</sub>               | 30 000                                        | 127           | 160       |                  | 180       | 3         |
| CuO <sub>x</sub> /Co <sub>3</sub> O <sub>4</sub> | 60 000                                        | 80            | 110       |                  |           | 4         |
| AtCo                                             | 60 000                                        | 100           | 120       | 123              | 150       | 5         |
| Co <sub>3</sub> O <sub>4</sub> /C-400            | 40 000                                        | 182           | 195       |                  |           | 6         |
| Co <sub>3</sub> O <sub>4</sub> -MOF              | 40 000                                        | 142           | 155       |                  |           | 6         |
| Co <sub>3</sub> O <sub>4</sub> -CeO <sub>2</sub> | 15 000                                        | 128           | 170       |                  |           | 7         |
| 20% La-Co <sub>3</sub> O <sub>4</sub>            | 120 000                                       | 98            | 150       | 117              | 165       | 8         |

The Arrhenius equation presented as follows:

$$\ln r_{\text{CO}} = \frac{-E_a}{RT} + n \ln [\text{CO}]_{\text{in}} + \ln A \quad (1)$$

where  $r_{\text{CO}}$  is the CO oxidation rate constant,  $A$  is the pre-exponential factor,  $R$  and  $T$  are the universal gas constant and the absolute temperature (K),  $n$  is the apparent reaction constant of CO oxidation, respectively. To make a general comparison of  $E_a$  values for different catalysts, the reaction temperature was varied to keep the conversion of CO at a relatively low level (less than 20%).

The rate constant was obtained as follows:

$$r_{\text{CO}} = \frac{[\text{CO}]_{\text{in}} \cdot Q \cdot \alpha}{m_{\text{cat}}} \quad (2)$$

Where  $Q$  is flow velocity ( $\text{m}^3/\text{s}$ ),  $m_{\text{cat}}$  is the catalyst mass (g).

$$\alpha = \frac{([\text{CO}]_{\text{in}} - [\text{CO}]_{\text{out}})}{[\text{CO}]_{\text{in}}} \times 100\% \quad (3)$$

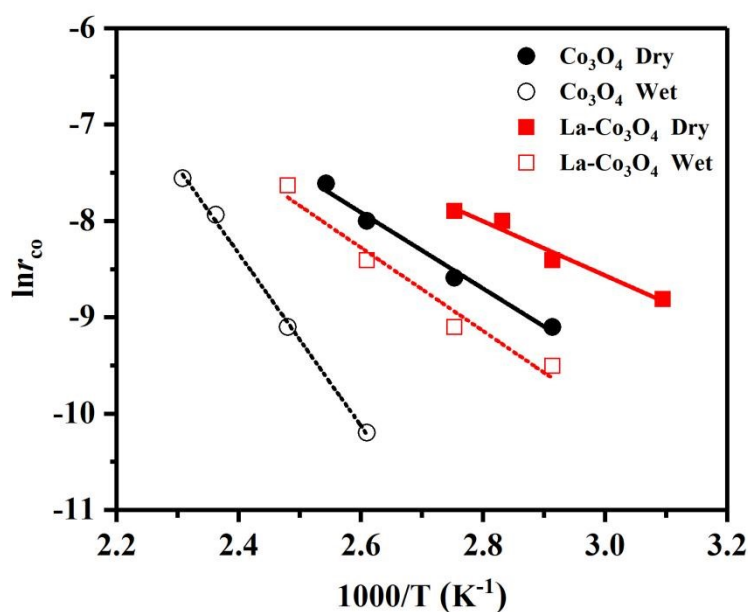

**Fig. S5** Arrhenius plots for CO oxidation on Co<sub>3</sub>O<sub>4</sub> and 2%La-Co<sub>3</sub>O<sub>4</sub> catalysts

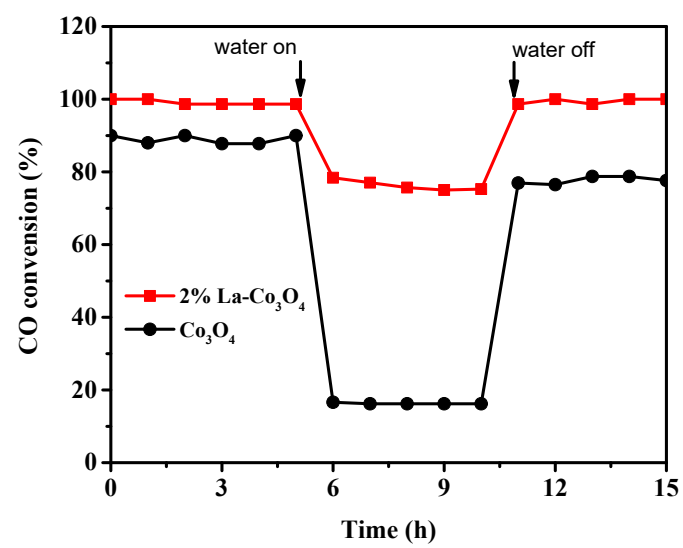

**Fig. S6** Long-term catalytic stability test on 2%La-Co<sub>3</sub>O<sub>4</sub> and Co<sub>3</sub>O<sub>4</sub> at 150 °C.

## References

- [1] J. Bae, D. Shin, H. Jeong, C. Choe, Y. Choi, J.W. Han, and H. Lee, *ACS Catal.* 2021, **11**, 11066–11074.
- [2] X.L. Xu, X.F. Sun, H. Han, H.G. Peng, W.M. Liu, X. Peng, X. Wang and X.J. Yang, *Appl. Surf. Sci.* 2015, **355**, 1254–1260.
- [3] C.C. Yin, Y.N. Liu, Q.N. Xia, S.F. Kang, X. Li, Y.G. Wang and L.F. Cui, *J. Colloid Interf. Sci.* 2019, **553**, 427–435.
- [4] S.Q. Zhao, P. Wu, J.J. Lin, Y.F. Li, A.Q. Li, X.J. Jin, Y. Chen, B.T. Zhao, Y. Zhao, G.X. Chen, Y.C. Qiu, D.Q. Ye and S.H. Yang, *Chem. Eng. J.* 2022, **429**, 132219.
- [5] B.X. Chu, S.Q. Liu, Q.J. Qin, R.Q. Zhao, K. Chen, X.Y. Hou, R.Y. Li, C. Li, J.H. Chen, L.H. Dong, and Bin Li, *Adv. Funct. Mater.* 2023, **33**, 221244.
- [6] X. Chen, J.J. Li, S.C. Cai, J. Chen, and H.P. Jia, *J. Mater. Chem. A* 2020, **8**, 6619.
- [7] H. Wang, D. Mao, J. Qi, Q.H. Zhang, X.H. Ma, S.Y. Song, L. Gu, R.B. Yu and D. Wang, *Adv. Funct. Mater.* 2019, **29**, 1806588.
- [8] J. Bae, D. Shin, H. Jeong, B. S. Kim, J. W. Han and H. Lee, *ACS Catal.* 2019, **9**(11), 10093-10100.
